# Supplementary material for: Temperature and chemical environment effects on the aggregation extent of water soluble perylene dye into vinyl alcohol-containing polymers
Source: Royal Society of Chemistry journal article supplement (doi:10.1039/b903120k), 2009-01-01

**Supplementary information of “Temperature and Chemical Environment Effects on the Aggregation Extent of Water Soluble Perylene Dye into Vinyl Alcohol Containing Polymers” by *Filippo Donati, Andrea Pucci, and Giacomo Ruggeri***

Figure S1. UV-Vis absorption spectra of PZPER in TFA at different concentration

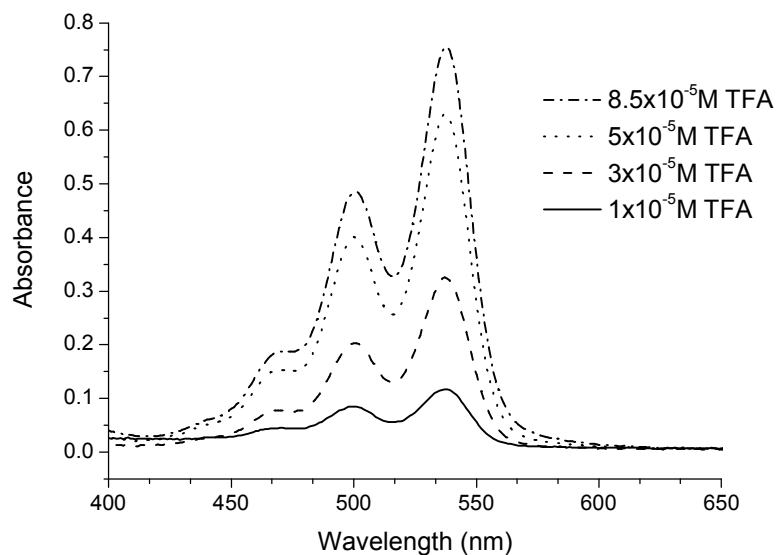

Figure S2. Picture of  $1 \times 10^{-4}$  M PZPER solutions in pure water (0%) and after the addition of progressive amounts of acetone (% by vol.) taken under the irradiation at 366 nm.

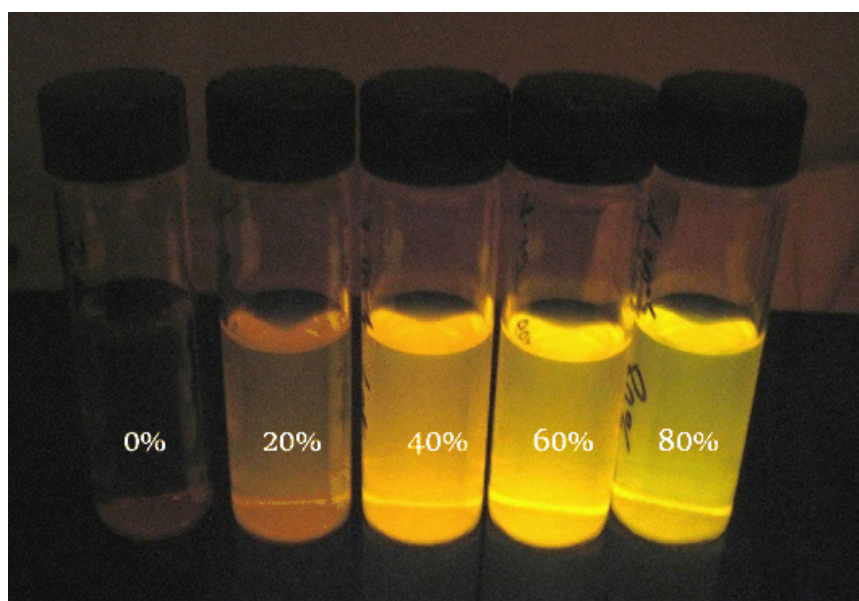

Figure S3. Scanning electron micrograph of (a) PVA and (b) EVAI<sub>27</sub> films containing the 1.1 wt.% of PZPER derivative

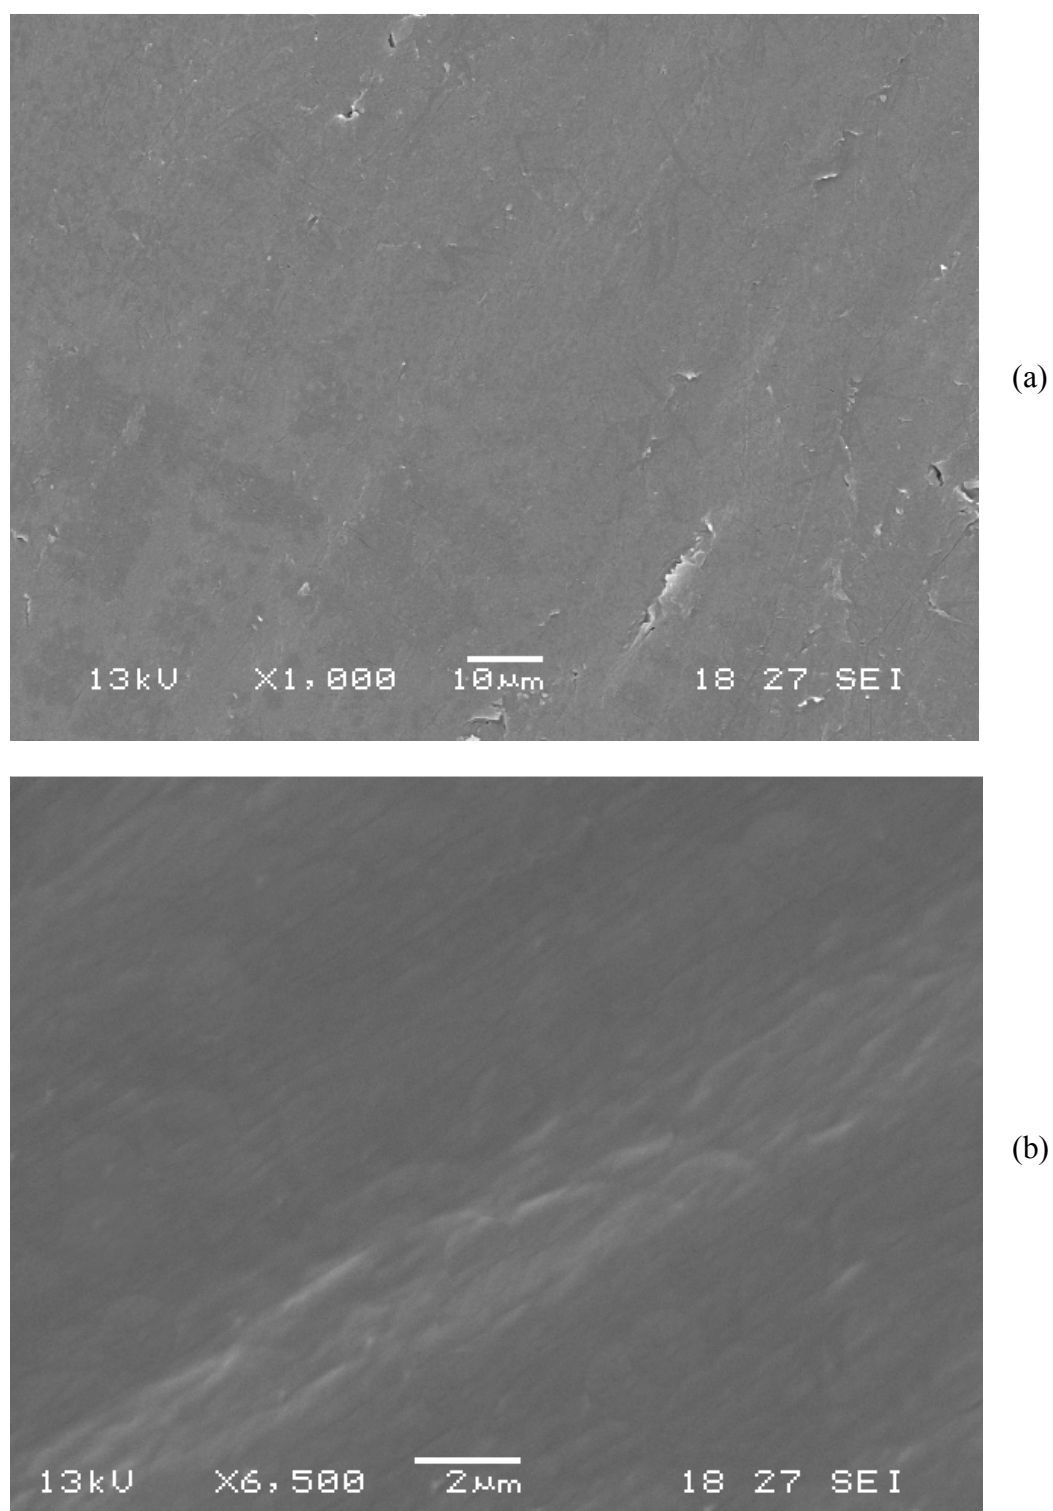

Supplement: b903120k.pdf [file b903120k.pdf]
